# Supplementary material
Source: PubMed Central journal article supplement (PMC535065)
Supplement: JCI0421625sf1.pdf [file JCI0421625sf1.pdf]

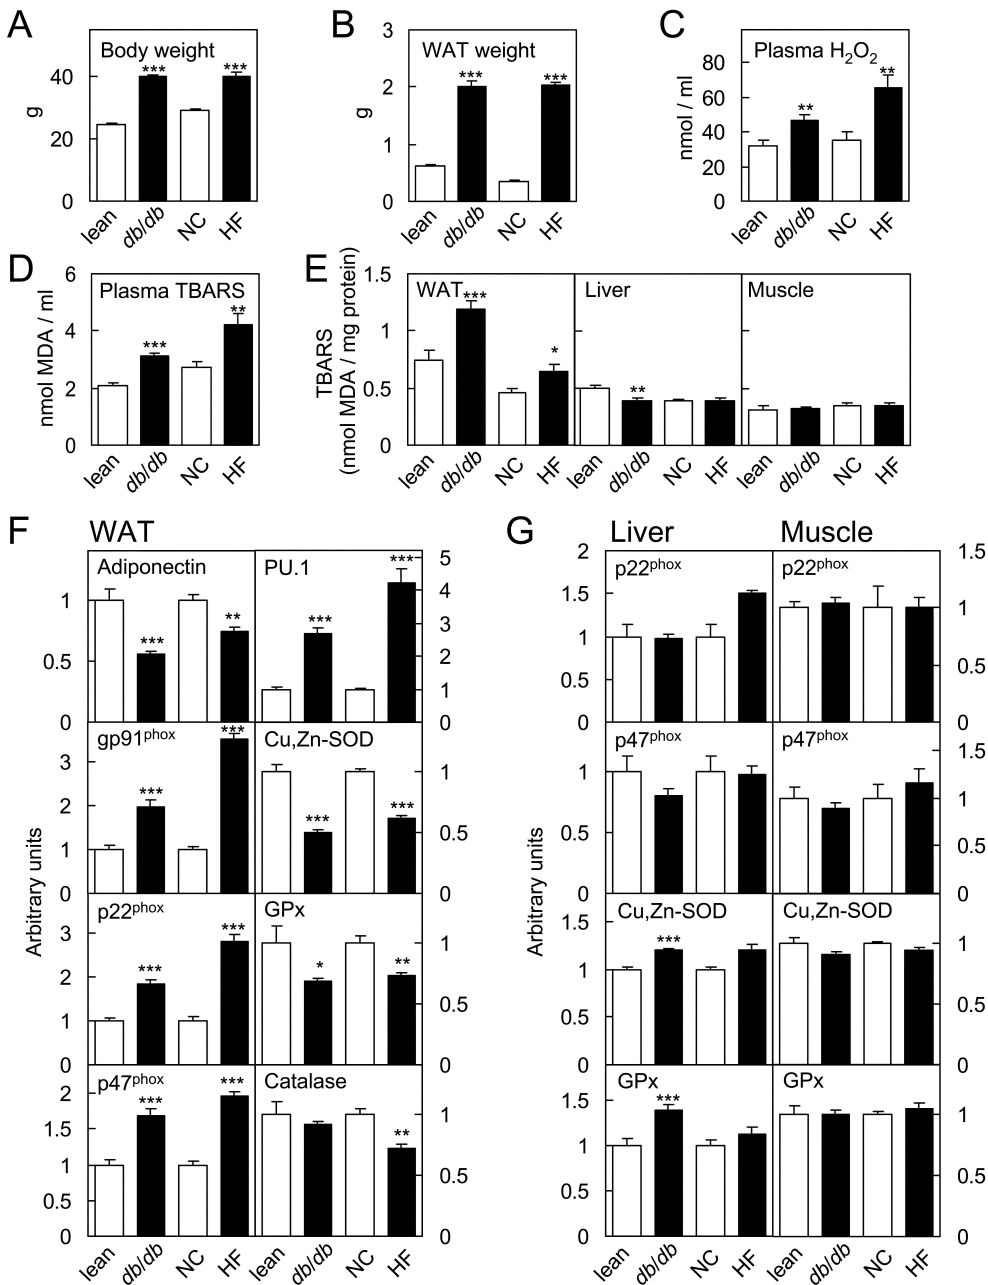

**Supplementary Figure 1** Oxidative stress and mRNA expressions in *db/db* or diet-induced obese (DIO) mice. (A) Body weight, (B) epididymal WAT weight, (C) plasma levels of H<sub>2</sub>O<sub>2</sub> and (D) plasma levels of lipid peroxidation in 8-week-old male lean (*db/+<sup>m</sup>*) and obese (*db/db*) mice, or in high-fat (HF) diet-induced obese mice and lean control mice fed normal chow (NC). (E) Tissue levels of lipid peroxidation in WAT, liver and skeletal muscle of lean and obese mice. (F and G) The mRNA expressions of adiponectin, NADPH oxidase subunits, PU.1 and antioxidant enzymes in WAT (F), liver (G, left) and skeletal muscle (G, right). For comparison, the expression level of the genes in lean mice was arbitrarily set at 1. Values are expressed as mean  $\pm$  SEM ( $n = 10$ ; *db/db* mice,  $n=4$ ; DIO mice). \* $P < 0.05$ ; \*\* $P < 0.01$ ; \*\*\* $P < 0.001$ , compared with lean control mice.
