# Supplementary material
Source: PubMed Central journal article supplement (PMC535065)
Supplement: JCI0421625sf2.pdf [file JCI0421625sf2.pdf]

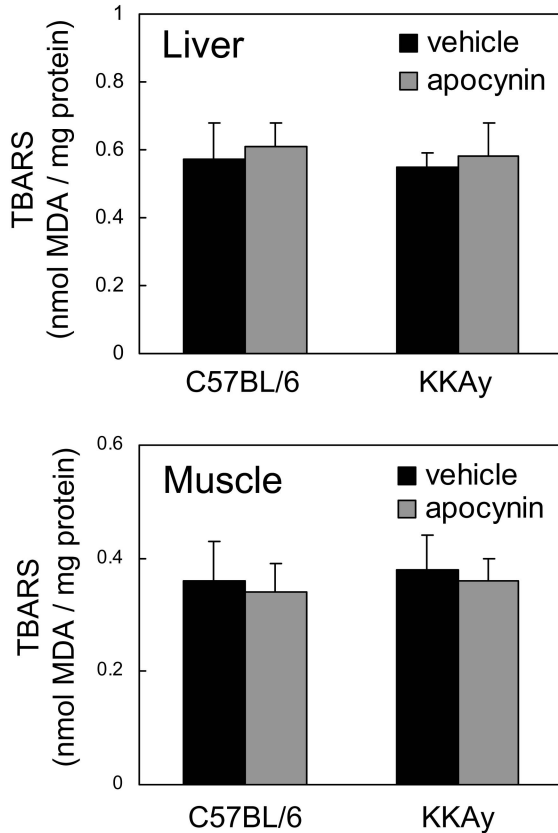

**Supplementary Figure 2** In vivo effects of NADPH oxidase inhibitor, apocynin, on the levels of lipid peroxidation in the liver and skeletal muscle of KKAY mice. The levels of lipid peroxidation in tissue homogenate were measured as TBARS. Values are expressed as mean  $\pm$  SEM ( $n = 8$ ).
