# Supplementary material
Source: PubMed Central journal article supplement (PMC535065)
Supplement: JCI0421625sf3.pdf [file JCI0421625sf3.pdf]

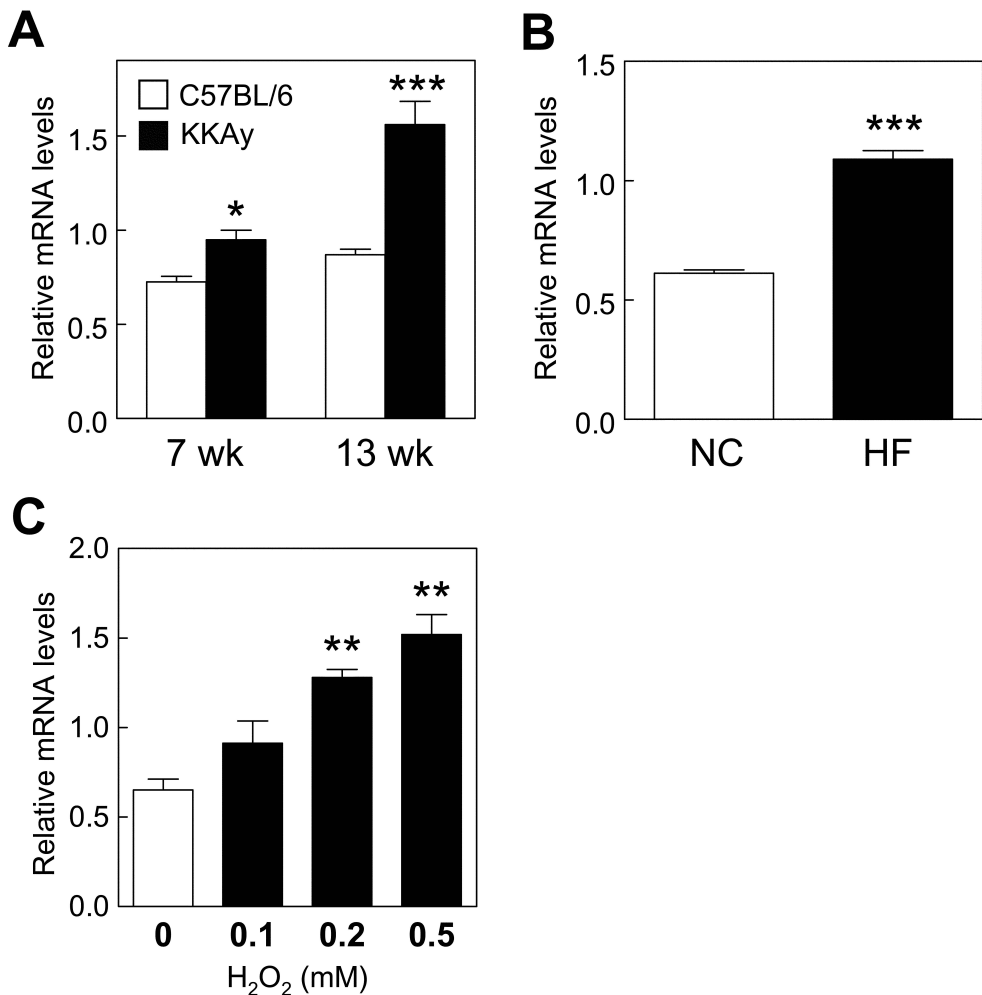

**Supplementary Figure 3** The mRNA expression of NOX4 in WAT of obese mice and 3T3-L1 adipocytes. **(A)** The mRNA expression of NOX4 in WAT of C57BL/6 (white bars) and KKAy (black bars) mice at 7 and 13 weeks of age. The mRNA amounts were quantified by real-time PCR. Values are normalized to the level of cyclophilin mRNA, and expressed as mean  $\pm$  SE ( $n = 6-8$ ). \* $P < 0.05$ ; \*\*\* $P < 0.001$ , compared with C57BL/6 mice. **(B)** The mRNA expression of NOX4 in WAT of mice fed normal chow (NC) or high-fat diet (HF). Values are expressed as mean  $\pm$  SE ( $n = 4$ ). \*\*\* $P < 0.001$ , compared with lean control mice. **(C)** The mRNA expression of NOX4 in 3T3-L1 adipocytes exposed to H<sub>2</sub>O<sub>2</sub>. Values are expressed as mean  $\pm$  SE ( $n = 3$ ). \*\* $P < 0.01$ , compared with control.
